# Supplementary material for: Amino-Terminal Pro–Brain Natriuretic Peptide, Brain Natriuretic Peptide, and Troponin T for Prediction of Mortality in Acute Heart Failure
Source: Oxford University Press journal article supplement (doi:10.1373/clinchem.2006.074047), 2007-01-26
Supplement: clinchem.2006.074047-1.doc [file clinchem.2006.074047-1.doc]

**Supplemental Table 1.** Comparison of characteristics between decedents and survivors at follow-up of A) 60 days and B) one year.

**A**

| **Characteristic** | **Mortality**  **(N=17)** | **No Mortality**  **(N=192)** | ***P*** |
| --- | --- | --- | --- |
| Age,*a* years | 80 (8.3) | 72 (13.7) | 0.06 |
| Male gender | 53% | 51% | 0.41 |
| New York Heart Association Class IV | 53% | 54% | 0.74 |
| Past medical history  Cardiomyopathy  Arrhythmia  Hypertension  Diabetes mellitus  Coronary artery disease  Myocardial infarction  Congestive heart failure | 29%  41%  59%  22%  47%  24%  65% | 19%  31%  64%  3.4%  42%  20%  53% | 0.20  0.55  0.74  0.002  0.79  0.71  0.51 |
| Medications at presentation  Beta blocker  Loop diuretic  Digoxin  Angiotensin converting enzyme inhibitor  Angiotensin receptor blocker  Aspirin  Nitrate | 53%  59%  29%  18%  12%  56%  15% | 56%  55%  22%  34%  7%  33%  13% | 0.98  0.78  0.88  0.14  0.20  0.03  0.45 |
| Pulse rate,*a* beats per minute | 92 (19) | 86 (24) | 0.09 |
| Systolic blood pressure,*a* mm Hg | 123 (29) | 141 (30) | 0.39 |
| Body-mass index *a* | 26 (4.9) | 27 (7.0) | 0.88 |
| Creatinine clearance,*a* mL  min–1  (1.73 m2)–1 | 46.3 (18.5) | 67.4 (26.0) | <0.001 |
| Creatinine,*b* mol/L | 123 (46) | 97 (42) | <0.001 |
| Left ventricular ejection fraction,*a* % | 47.5 (20) | 46.3 (18) | 0.88 |
| Troponin T,*b* g/L | 0.03 | <0.01 | 0.009 |
| NT-proBNP,*b* ng/L  BNP,*b* ng/L | 9332 (3864, 15717)  589 (212, 1455) | 3511 (1610, 9541)  352 (146, 756) | 0.02  0.05 |

**B**

| **Characteristic** | **Mortality**  **(N=56)** | **No Mortality**  **(N=153)** | ***P*** |
| --- | --- | --- | --- |
| Age,*a* years | 80 (10.6) | 71 (14.1) | <0.001 |
| Male gender | 46% | 53% | 0.55 |
| New York Heart Association Class IV | 60% | 48% | 0.05 |
| Past medical history  Cardiomyopathy  Arrhythmia  Hypertension  Diabetes mellitus  Coronary artery disease  Myocardial infarction  Congestive heart failure | 23%  29%  67%  13%  52%  66%  66% | 18%  33%  62%  9%  39%  21%  50% | 0.12  0.56  0.88  0.45  0.02  0.001  0.09 |
| Medications at presentation  Beta blocker  Loop diuretic  Digoxin  Angiotensin converting enzyme inhibitor  Angiotensin receptor blocker  Aspirin | 53%  59%  25%  20%  7%  42% | 56%  55%  22%  37%  8%  21% | 0.76  0.51  0.91  0.13  0.99  0.06 |
| Pulse rate,*a* beats per minute | 85 (22) | 81 (24) | 0.48 |
| Systolic blood pressure,*a* mm Hg | 131 (28) | 140 (30) | 0.02 |
| Body-mass index *a* | 25 (5.0) | 27 (6.0) | 0.01 |
| Creatinine clearance,*a* mL  min–1  (1.73 m2)–1 | 50 (19) | 61 (27) | <0.001 |
| Creatinine,*a* mol/L | 123 (44) | 106 (41) | 0.05 |
| Left ventricular ejection fraction,*a* % | 49 (20) | 49 (17) | 0.87 |
| Troponin T,*b* g/L | 0.02 | <0.01 | 0.009 |
| NT-proBNP,*b* ng/L  BNP,*b* ng/L | 8024 (2892, 13241)  543 (218,1308) | 3165 (1399, 9055)  333 (132, 700) | <0.001  <0.001 |

*a* Data are presented as the mean (SD).

*b* Data are presented as the median (interquartile range).
