# Supplementary material for: Amino-Terminal Pro–Brain Natriuretic Peptide, Brain Natriuretic Peptide, and Troponin T for Prediction of Mortality in Acute Heart Failure
Source: Oxford University Press journal article supplement (doi:10.1373/clinchem.2006.074047), 2007-01-26
Supplement: clinchem.2006.074047-2.doc [file clinchem.2006.074047-2.doc]

**Supplemental Figure 1:** Correlations between cTnT and A) log-NT-proBNP or B) log-BNP.
